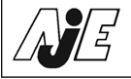

## Practice of Epidemiology

# Quantitative Serum Nuclear Magnetic Resonance Metabolomics in Large-Scale Epidemiology: A Primer on -Omic Technologies

Peter Würtz\*, Antti J. Kangas, Pasi Soininen, Debbie A. Lawlor, George Davey Smith, and Mika Ala-Korpela\*

\* Correspondence to Dr. Peter Würtz, Computational Medicine, Faculty of Medicine, Aapistie 5A, P.O. Box 5000, FI-90014 University of Oulu, Finland (e-mail: [peter.wurtz@computationalmedicine.fi](mailto:peter.wurtz@computationalmedicine.fi)); or Dr. Mika Ala-Korpela, Computational Medicine, Faculty of Medicine, Aapistie 5A, P.O. Box 5000, FI-90014 University of Oulu, Finland (e-mail: [mika.ala-korpela@computationalmedicine.fi](mailto:mika.ala-korpela@computationalmedicine.fi)).

Initially submitted July 16, 2016; accepted for publication January 19, 2017.

Detailed metabolic profiling in large-scale epidemiologic studies has uncovered novel biomarkers for cardiometabolic diseases and clarified the molecular associations of established risk factors. A quantitative metabolomics platform based on nuclear magnetic resonance spectroscopy has found widespread use, already profiling over 400,000 blood samples. Over 200 metabolic measures are quantified per sample; in addition to many biomarkers routinely used in epidemiology, the method simultaneously provides fine-grained lipoprotein subclass profiling and quantification of circulating fatty acids, amino acids, gluconeogenesis-related metabolites, and many other molecules from multiple metabolic pathways. Here we focus on applications of magnetic resonance metabolomics for quantifying circulating biomarkers in large-scale epidemiology. We highlight the molecular characterization of risk factors, use of Mendelian randomization, and the key issues of study design and analyses of metabolic profiling for epidemiology. We also detail how integration of metabolic profiling data with genetics can enhance drug development. We discuss why quantitative metabolic profiling is becoming widespread in epidemiology and biobanking. Although large-scale applications of metabolic profiling are still novel, it seems likely that comprehensive biomarker data will contribute to etiologic understanding of various diseases and abilities to predict disease risks, with the potential to translate into multiple clinical settings.

amino acids; biomarkers; drug development; fatty acids; Mendelian randomization; metabolomics; nuclear magnetic resonance; serum

Abbreviations: BMI, body mass index; CVD, cardiovascular disease; HMGCR, 3-hydroxy-3-methylglutaryl-coenzyme A reductase; LDL, low-density lipoprotein; MS, mass spectrometry; NMR, nuclear magnetic resonance.

Omic profiling—genomics, epigenetics, proteomics, and metabolomics—is becoming increasingly widespread in the worldwide efforts to prevent noncommunicable diseases. This is driven by the quest for better etiologic understanding but also importantly by technical developments that allow quantitative high-throughput methodologies for several -omics, notably genome-wide single nucleotide polymorphisms (1, 2), genome-wide DNA methylation (3, 4), and detailed metabolic profiling (5–14). Advancements in the experimental throughput of metabolomics have paved the way for applications in large-scale epidemiologic studies, and the utility of metabolic profiling to advance our understanding of disease etiologies and to improve risk

predictions is becoming apparent (5, 15–18). The simultaneous quantification of circulating biomarkers across multiple pathways gives a fine-grained snapshot of a person's metabolic state and offers molecular insights on health and disease. Recent advancements in experimental throughput have paved the way for widespread applications of metabolic profiling in population cohorts, with an initial focus on the etiology and biomarkers of cardiometabolic diseases (5–7, 19–24).

General aspects of design and analysis of metabolomics studies in epidemiologic research has recently been reviewed in this journal (20). In this review, we focus on large-scale epidemiologic applications of nuclear magnetic resonance

(NMR) metabolomics for quantifying circulating biomarkers. The emphasis is on a specific platform for quantitative high-throughput serum metabolomics, because this is the first, and currently the only, NMR-based metabolomics platform broadly applied in large-scale epidemiologic studies (5). We start out by covering the overall characteristics of this platform. We also detail how integration of metabolic profiling data with genetics can enhance drug development, and we provide some reflections on study design and statistical analyses based on lessons learned from various applications of metabolic profiling in large cohort studies.

## FROM LIPOPROTEIN QUANTIFICATION TO COMPREHENSIVE METABOLIC PROFILING

### A high-throughput NMR platform for epidemiologic applications

NMR-based lipoprotein quantification has a long history (22, 25, 26). During the past decade, our research team has focused on the development of a quantitative NMR metabolomics platform for high-throughput profiling of serum (and plasma) samples, in which the lipoprotein quantification has been taken to subclass level, and the metabolic quantifications extended broadly beyond lipoproteins (5, 23). The development has been made from the initial phase with applications in epidemiology and clinical settings in mind. This focus has directed experimental optimization for absolute quantification, maximal throughput, and cost-effectiveness.

In addition to analyses of lipoprotein measures, recently extensively reviewed by Mallol et al. (25), NMR spectroscopy can also be used as a general method to quantify multiple molecular constituents in serum and other biofluids (27–29). However, with the exception of studies using the NMR metabolomics platform described in this review, very few applications of NMR for quantifying a broad spectrum of circulating metabolites have been published in epidemiologic contexts (5, 29, 30). Thus, the situation in the field is currently such that the large-scale applications of serum NMR metabolomics (summarized in Table 1) include only studies based on the platform in question.

An overview of the metabolic biomarkers quantified by the high-throughput serum NMR platform is shown in Web Figure 1 (available at <https://academic.oup.com/aje>). A multitude of metabolic measures is quantified directly from serum in a single experiment. The profiling covers both standard lipid measures and a wealth of other metabolic biomarkers. In contrast to other NMR methodologies of advanced lipoprotein profiling (25, 31–33), this platform also provides quantification of many fatty-acid measures, some abundant proteins, and a broad range of low-molecular-weight metabolites together with very detailed lipoprotein subclass profiling (5). The panel of biomarkers has not been preselected based on anticipated biological relevance, but the metabolic measures are included because it is feasible to quantify these measures robustly in a single experiment (23). Circulating metabolites at concentrations down to  $\approx 10$   $\mu\text{mol/L}$  are quantified, but the exact limit depends on the molecular identity. The biomarker output provided contains the majority of the metabolic information reliably quantifiable by NMR spectroscopy of serum (5, 23). Even with a substantial increase in the measurement time

(at the expense of cost-effectiveness), only a few measures could be added to the biomarker panel. The experimental capacity is linearly scalable, dependent only on the number of spectrometers. The pricing for the entire biomarker panel is comparable to that of the more restricted lipid testing by routine clinical chemistry methods (5).

In the case of the NMR metabolomics platform discussed here, over 200 biochemically and metabolically distinct measures are given as the standard output (Web Figure 1). This number includes around 150 primary concentrations as well as selected ratios. For instance, individual fatty-acid concentrations relative to total fatty acids are included because they better reflect the biology of individual fatty acids than do the absolute concentrations (34), and the ratios are commonly the only metric captured by complementary analytic methods (35). The lipid composition measures of lipoprotein subclass particles are also included in the overall number of metabolic measures because they define a biologically separate entity of measures (36).

### Sample preparation

The blood samples routinely collected in epidemiologic cohorts and biobanks can be directly used for metabolic profiling. In general, any collection of blood samples amenable for lipid testing by standard methods can be used for the NMR platform. This means that samples stored long-term must have been kept at a temperature of  $-70^{\circ}\text{C}$  or colder to retain the composition of lipoprotein particles, and the integrity of other metabolic measures. Both fasting and nonfasting samples can be analyzed (5, 37). The spectral characteristics of serum samples reflect various aspects of sample quality, and quality-control procedures can detect irregularities due to potential sample degradation. A sample volume of either 100  $\mu\text{L}$  or 350  $\mu\text{L}$  is used for the analysis, with both volumes yielding the same set of metabolic measures; analyses with the larger volume are more cost-effective due to shorter measurement time in the NMR spectrometer. One of the primary advantages of NMR is the minimal sample preparation required. Automated liquid handlers simply mix a buffer with the serum and move the material to 96-format racks of NMR tubes. The racks are subsequently inserted into the robotic sample changer, cooled to refrigerator temperature. The sample changer holds 480 samples simultaneously, yielding over 24 hours of automated measurements before the need to reload more samples. Automated shimming, accurate temperature control, and stable electronics in modern off-the-shelf NMR spectrometers have been a prerequisite for the high throughput. Details of the present platform have been described previously (5, 23). The original methodology was based on 3 molecular windows, of which 2 were acquired from the original serum samples, and 1 from the serum lipid extracts (23, 38, 39). More recently, a faster method has been developed in which the computational analysis circumvents the need for experimental lipid extractions.

In NMR spectroscopy, absolute quantification of metabolic measures in absolute units, rather than relative to another measure, can currently be achieved without external standards added to the blood specimen (40). In the NMR metabolomics platform that is the focus of this review, advanced proprietary software with integrated quality control is used to convert the spectral information to absolute concentrations of the metabolic measures. The basis for the metabolite quantification is Bayesian

**Table 1.** Metabolic Profiling Studies That Had >5,000 Participants and That Used Quantitative Serum Nuclear Magnetic Resonance Metabolomics

| Focus                                                    | Study Populations and Description                                                                                                                                                                                                                                                                                                                                                                                                                                                                                                                                                                                                                                                                                                                                                               | Reference(s)       |
|----------------------------------------------------------|-------------------------------------------------------------------------------------------------------------------------------------------------------------------------------------------------------------------------------------------------------------------------------------------------------------------------------------------------------------------------------------------------------------------------------------------------------------------------------------------------------------------------------------------------------------------------------------------------------------------------------------------------------------------------------------------------------------------------------------------------------------------------------------------------|--------------------|
| <i>Biomarkers for Disease Events and Risk Prediction</i> |                                                                                                                                                                                                                                                                                                                                                                                                                                                                                                                                                                                                                                                                                                                                                                                                 |                    |
| Cardiovascular disease                                   | Biomarker discovery for risk of first incident cardiovascular event ( $n = 13,441$ Finns and Britons from 3 population-based studies with 12–23 years of follow-up). Phenylalanine and MUFAs were found to be predictive of higher CVD event risk, whereas omega-6 fatty acids and docosahexaenoic acid levels were inversely associated with CVD event risk, after adjustment for routine lipid levels and other risk factors. These 4 biomarkers in combination improved risk reclassification above established risk factors in 2 validation cohorts. Analytic and biological comparison of biomarkers quantified by the NMR platform and 2 MS platforms ( $n > 2,000$ Americans and $n > 2,000$ Finns in the analytic and biological comparison between NMR and MS biomarker associations). | 7                  |
| All-cause mortality                                      | Discovery and replication of biomarkers for 5-year risk of death. Glycoprotein acetylation, albumin, VLDL particle size, and citrate were found to be strongly predictive of the short-term risk of all-cause mortality, and a biomarker score was shown to improve risk prediction and illustrate a potential clinical application for patient prioritization ( $n = 17,345$ Estonians and Finns from 2 population-based studies).                                                                                                                                                                                                                                                                                                                                                             | 37                 |
| Inflammation                                             | Molecular etiology of glycoprotein acetylation, the strongest biomarker for all-cause mortality identified in Fischer et al. (37), investigated by cytokine panels and whole blood gene expression networks. Glycoprotein acetylation was found to be a marker of chronic inflammation related to increased neutrophil activity and strongly predictive of the long-term risk for sepsis and respiratory infections ( $n \approx 10,000$ Finns from 3 population-based cohorts).                                                                                                                                                                                                                                                                                                                | 16                 |
| Type 2 diabetes mellitus                                 | Cross-sectional associations of 8 amino acids with glycemia ( $n \approx 9,400$ Finnish men) and risk for onset of type 2 diabetes ( $n = 526$ ). Branched-chained and aromatic amino acids, as well as alanine and glutamine, were predictive of diabetes risk, partly explained by insulin resistance.                                                                                                                                                                                                                                                                                                                                                                                                                                                                                        | 34, 36, 42, 43, 90 |
|                                                          | Cross-sectional and prospective associations of the ketones acetoacetate and $\beta$ -hydroxybutyrate ( $n \approx 9,400$ Finnish men/ $n \approx 4,300$ in prospective analyses), showing positive association with future glucose tolerance and, in the case of acetoacetate, higher risk for diabetes onset. The results were attributed to insulin sensitivity rather than insulin resistance.                                                                                                                                                                                                                                                                                                                                                                                              | 56                 |
|                                                          | Associations of fatty acids with 5-year glucose tolerance and type 2 diabetes risk ( $n \approx 9,400$ Finnish men/ $n \approx 4,300$ in prospective analyses), showing that glycerol, triglycerides, and MUFAs are positively associated with diabetes risk, and omega-6 fatty acids are inversely associated.                                                                                                                                                                                                                                                                                                                                                                                                                                                                                 | 34                 |
|                                                          | Prospective associations of lipids and lipoprotein subclass measures with glycemia and type 2 diabetes risk ( $n \approx 6,607$ Finnish men), showing stronger predictive associations of lipoprotein and apolipoprotein ratios than routine lipid measures.                                                                                                                                                                                                                                                                                                                                                                                                                                                                                                                                    | 78                 |
|                                                          | <i>Metabolic Risk-Factor Characterization</i>                                                                                                                                                                                                                                                                                                                                                                                                                                                                                                                                                                                                                                                                                                                                                   |                    |
| Adiposity                                                | Mendelian randomization analyses of body mass index as a causal risk factor for systemic metabolism: causal effects of adiposity on numerous metabolic measures, including branched-chain and aromatic amino acids, omega-6 fatty acids, and glycoprotein acetylation as well as multiple lipoprotein lipid subclasses and particle size measures ( $n = 12,664$ young adults from 4 population-based cohorts in Finland). Weight changes were paralleled by extensive metabolic changes, with a similar metabolic signature as observed cross-sectionally and genetically ( $n \approx 1,500$ with 3 time points).                                                                                                                                                                             | 8                  |
| Insulin resistance                                       | Cross-sectional associations of metabolites with insulin resistance index ( $n = 7,098$ young Finnish adults from 2 population-based cohorts in Finland). Results showed numerous strong metabolite associations with insulin resistance, independent of components of the metabolic syndrome, and uncovered multiple sex-specific associations and adiposity interactions.                                                                                                                                                                                                                                                                                                                                                                                                                     | 21                 |
|                                                          | Cross-sectional associations of lipoprotein subclass measures with different indices for insulin resistance, showing more prominent associations with liver insulin resistance than with whole-body insulin sensitivity ( $n = 8,750$ Finnish men).                                                                                                                                                                                                                                                                                                                                                                                                                                                                                                                                             | 91                 |
|                                                          | Cross-sectional associations of lipoprotein subclass profiles with glucose tolerance categories and insulin resistance index, showing prominent associations of insulin sensitivity with VLDL and HDL subclasses, including heterogenic associations for small HDL ( $n = 9,400$ Finnish men).                                                                                                                                                                                                                                                                                                                                                                                                                                                                                                  | 36                 |
| Sex hormone-binding globulin                             | Mendelian randomization analysis indicating that sex hormone-binding globulin is strongly associated with numerous circulating metabolites but not a causal risk factor for the systemic metabolic effects ( $n \approx 16,000$ from 4 Finnish cohorts for either cross-sectional or causality analyses).                                                                                                                                                                                                                                                                                                                                                                                                                                                                                       | 74                 |
| Birth weight                                             | Associations of lower birth weight with the metabolic profile in adolescents and adults. The metabolic associations found were of modest magnitude and displayed a similar overall metabolic signature as the metabolite association pattern with higher adiposity ( $n = 18,288$ from 7 population-based cohorts from Finland and the United Kingdom).                                                                                                                                                                                                                                                                                                                                                                                                                                         | 73                 |

Table continues

Table 1. Continued

| Focus                                          | Study Populations and Description                                                                                                                                                                                                                                                                                                                                                                                                                                                                                                                  | Reference(s) |
|------------------------------------------------|----------------------------------------------------------------------------------------------------------------------------------------------------------------------------------------------------------------------------------------------------------------------------------------------------------------------------------------------------------------------------------------------------------------------------------------------------------------------------------------------------------------------------------------------------|--------------|
| Menopause and aging                            | Associations of age, sex, and menopause with the systemic metabolic profile, assessed cross-sectionally ( $n \approx 23,000$ people from 8 cohorts in Finland and Estonia). Menopause status was associated with glutamine, tyrosine, and isoleucine, along with atherogenic lipoprotein measures.                                                                                                                                                                                                                                                 | 92           |
| Alcohol consumption                            | Cross-sectional associations of alcohol consumption with the systemic metabolic profile ( $n = 9,778$ young Finnish adults from 3 population-based cohorts). Results showed robust biomarkers for alcohol intake beyond routine lipids, including adverse associations with omega-6 fatty acids, MUFAs, glutamine, and citrate. Longitudinal analyses showed that the metabolic signature of alcohol intake track with changes in alcohol intake ( $n \approx 1,450$ with 3 time points).                                                          | 93           |
| Vitamin D                                      | Cross-sectional associations of serum 25-hydroxyvitamin D concentrations with the systemic metabolic profile ( $n = 1,726$ in a discovery cohort and $n = 6,759$ in a replication cohort). Results showed 30 replicated metabolic associations, including constituents of large VLDL and small LDL subclasses and related measures such as serum triglycerides, as well as fatty acids and measures reflecting the degree of fatty acid saturation.                                                                                                | 54           |
| <i>Metabolic Effects of Drug Interventions</i> |                                                                                                                                                                                                                                                                                                                                                                                                                                                                                                                                                    |              |
| Statin therapy                                 | Effects of statins on the systemic metabolic profile, assessed for 4 longitudinal cohorts ( $n = 5,590$ with 2 time points). Statins were shown to lower small VLDL particles and remnant cholesterol, in addition to the LDL-lowering effects. Minimal or no side effects on nonlipid metabolites were observed. The observational results were validated by Mendelian randomization analyses in 8 population-based cohorts ( $n = 27,914$ ), with associations in the <i>HMGCR</i> gene perfectly matching the longitudinal associations.        | 13           |
| Hormonal contraceptives                        | Effects of hormonal contraception on the systemic metabolic profile assessed in cross-sectional and longitudinal settings ( $n = 5,841$ women from 3 Finnish cohorts; $n = 869$ with 2 time points). Combined oral contraceptive pills were shown to have very prominent metabolic effects, including changes in many fatty acids and amino acids, and predominantly related to higher cardiometabolic risk. The metabolic aberrations were reversed upon discontinuation. Progestin-only contraceptives had little effect on systemic metabolism. | 75           |
| <i>Genome-Wide Association Studies</i>         |                                                                                                                                                                                                                                                                                                                                                                                                                                                                                                                                                    |              |
| Genetic determinants of circulating biomarkers | GWAS of 115 metabolic measures and 99 derived measures from the NMR platform. The study identified metabolic associations at 31 loci, including 11 novel loci ( $n = 8,330$ individuals from 5 population-based cohorts in Finland), and provided heritability estimates from twin pairs ( $n = 561$ pairs; 221 monozygotic and 340 dizygotic pairs).                                                                                                                                                                                              | 85           |
|                                                | GWAS of 123 metabolic measures from NMR metabolomics (up to $n = 24,925$ individuals from 14 European cohorts). The study identified associations at 62 loci, including 8 novel loci for amino acids and other metabolites. The results further elucidated the effects of lipoprotein(a) on lipid metabolism.                                                                                                                                                                                                                                      | 30           |
|                                                | GWAS of 11 metabolic networks, identifying 34 genomic loci, of which 7 were novel. The results illustrate how multivariate analysis of correlated metabolic measures can boost power for gene discovery ( $n = 6,608$ from 2 Finnish cohorts).                                                                                                                                                                                                                                                                                                     | 94           |
| <i>Functional Genetics</i>                     |                                                                                                                                                                                                                                                                                                                                                                                                                                                                                                                                                    |              |
| Lipid genes                                    | Metabolic profiling and genetic fine-mapping of 95 lipid loci, showing refined lipid associations with numerous loci and illustrating how most lipid genes affect a broad span of lipid measures ( $n = 8,330$ individuals from 5 population-based cohorts in Finland).                                                                                                                                                                                                                                                                            | 83           |
| Lipid genes/pleiotropy                         | Assessment of pleiotropy in 6 cholesterol- and triglyceride-related genes. The broad lipid association patterns indicated that the lipid loci cannot be attributed to a single routine lipid measure, and the implications for Mendelian randomization studies are discussed ( $n = 10,547$ individuals from 3 population-based cohorts in Finland).                                                                                                                                                                                               | 51           |
| Type 2 diabetes genes                          | Lipoprotein subclass profiling of 34 risk loci for type 2 diabetes. The results suggest that only a small number of diabetes loci affect lipoprotein lipid measures ( $n = 6,580$ individuals from a population-based cohort of Finnish men).                                                                                                                                                                                                                                                                                                      | 95           |
| Liver function genes                           | Metabolic profiling of 42 genetic loci associated with concentrations of liver enzymes in plasma, highlighting multimetabolic effects of several loci ( $n = 6,516$ individuals from 2 population-based cohorts from Finland and the United Kingdom).                                                                                                                                                                                                                                                                                              | 96           |
| Blood-pressure genes                           | Metabolic profiling of 29 blood pressure genes, indicating weak (if any) effects of blood pressure on the circulating metabolic measures ( $n = 7,032$ individuals from 3 population-based cohorts in Finland).                                                                                                                                                                                                                                                                                                                                    | 97           |
| Interleukin-1 inhibition gene                  | Lipoprotein subclass profiling of genes encoding IL-1 receptor antagonist, detailing the proatherogenic lipid effects of IL-1 inhibition, with implications for treatment of cardiometabolic disease by IL-1 inhibitors ( $n = 8,330$ individuals from 5 population-based cohorts in Finland).                                                                                                                                                                                                                                                     | 76           |
| Triglyceride metabolism gene                   | Metabolic profiling of a rare variant in <i>APOC3</i> , detailing the VLDL effects of <i>APOC3</i> and showing partly independent effects compared with the <i>LPL</i> gene ( $n = 13,285$ from 2 population-based cohorts in the United Kingdom).                                                                                                                                                                                                                                                                                                 | 67           |

Table continues



Table 1. Continued

| Focus                                              | Study Populations and Description                                                                                                                                                                                                                                                                                                     | Reference(s) |
|----------------------------------------------------|---------------------------------------------------------------------------------------------------------------------------------------------------------------------------------------------------------------------------------------------------------------------------------------------------------------------------------------|--------------|
| HDL metabolism gene                                | Lipoprotein subclass profiling and genetic fine-mapping of <i>GALNT2</i> , a locus associated with HDL cholesterol. Results showed the most prominent associations of <i>GALNT2</i> with cholesterol in medium-sized HDL particles ( $n \approx 10,000$ Finnish men).<br><i>Bioinformatics Applications</i>                           | 98           |
| Multivariate meta-analysis of genome-wide studies  | Multivariate associations of lipoprotein subclass measures (and genotypes), similar to the approach used in Inouye et al. (94), but allowing analysis based on summary statistics-based of single or multiple cohorts ( $n = 10,753$ from 3 Finnish population-based cohorts).                                                        | 99           |
| Multivariate gene-metabolome associations          | Bayesian reduced-rank regression to assess the impact of multiple single nucleotide polymorphisms on a high-dimensional phenotype, demonstrated for the case of lipoprotein subclass measures. Two novel lipid genes were identified by the multivariate GWAS approach ( $n \approx 10,000$ from Finnish 3 population-based cohorts). | 100          |
| Multiple output regression with latent noise       | Study illustrating how structured noise can, and should, be taken advantage of when assessing the associations between covariates and target variables, using multi-omics data and various metabolic measures ( $n = 5,211$ from 2 Finnish population-based cohorts).                                                                 | 101          |
| Network analysis integrating genome and metabolome | Methodology to assess differences in molecular associations and underlying genetic variants, illustrated in the context of obesity ( $n = 7,255$ from 2 Finnish population-based cohorts).                                                                                                                                            | 102          |

Abbreviations: *APOC3*, apolipoprotein C3 gene; CVD, cardiovascular disease; *GALNT2*, UDP-*N*-acetyl- $\alpha$ -D-galactosamine: polypeptide *N*-acetylgalactosaminyltransferase 2 gene; GWAS, genome-wide association study; HDL, high-density lipoprotein; *HMGCR*, 3-hydroxy-3-methylglutaryl-coenzyme A reductase gene; LDL, low-density lipoprotein; *LPL*, lipoprotein lipase gene; MS, mass spectrometry; MUFA, monounsaturated fatty acid; NMR, nuclear magnetic resonance; VLDL, very low-density lipoprotein.

modeling, as described previously (5, 23, 41). The output data for each sample comprise a list of concentrations for the metabolic measures summarized in Web Figure 1. In comparison with clinical chemistry assays, the NMR metabolomics platform essentially just provides more biomarkers in a single experiment. The accuracy of biomarker quantification by the platform is comparable to what is commonly achieved by assays routinely used in clinical chemistry (see the caption for Web Figure 1) (30). The consistent biomarker quantification is due to the inherently reproducible nature of NMR spectroscopy; the samples never come into contact with the radiofrequency detector in the NMR spectrometer. This makes NMR metabolomics essentially free of batch effects that commonly hamper applications of mass spectrometry (MS) to large-scale epidemiologic studies. Biomarker quantification directly from serum, without any sample extraction procedures, further contributes to the high reproducibility. The NMR metabolomics platform featured here employs a targeted approach, meaning that an a priori defined set of metabolites is quantified from the experimentation. The platform is therefore not designed for novel biomarker discovery as such, in contrast to untargeted metabolomics approaches. Nonetheless, epidemiologic analyses based on the NMR platform have identified multiple novel and emerging biomarkers for cardiometabolic diseases (5, 7, 34, 42–44), because many of the quantified metabolic measures have not previously been studied in large cohorts. The pros and cons of targeted versus untargeted metabolomics approaches have been reviewed elsewhere (20, 45).

#### NMR, MS, and clinical chemistry: analytic and biological consistency

Figure 1 shows that biomarker concentrations quantified by the NMR metabolomics platform were highly consistent with

the concentrations obtained from routine clinical chemistry. Figures 2 and 3 show that quantification of emerging biomarkers, such as fatty acids and ketone bodies, by NMR is also coherent with results from other analytic methods. With quantitative biomarker data, it does not make a fundamental difference whether a metabolic measure is quantified by NMR or by alternative analytics—if each method identifies a particular molecular measure, only the accuracy and precision of the concentration measurement may differ (i.e., we do not have an NMR-molecule, an MS-molecule, or a clinical chemistry molecule but only a molecule). For applications of metabolomics in epidemiology, consistency of metabolic biomarker associations with disease events across different platforms is important, maybe more so than exact analytic correspondence in absolute concentrations. Figure 4 shows that emerging biomarkers quantified by both NMR spectroscopy and 2 widely used MS platforms have similar associations with disease incidence. These results suggest that associations of amino acids and gluconeogenesis metabolites with cardiovascular disease (CVD) risk are broadly consistent in their association with CVD, regardless of whether the biomarkers are quantified by NMR or MS. Accordingly, associations of amino acids with the risk for type 2 diabetes mellitus have also been consistent across NMR and MS platforms (46).

The advantages and disadvantages of NMR and MS—2 key technologies for metabolic profiling—have recently been extensively covered in multiple reviews (12, 45, 47–49). These analytic techniques offer mainly complementary insights, partly due to their different biomarker coverage. The higher sensitivity of MS allows for quantification of low-concentration metabolites and thus more in-depth characterization of pathophysiological mechanisms (9, 50). In contrast, the cost-effective metabolite quantification by NMR favors large-scale epidemiologic studies, such

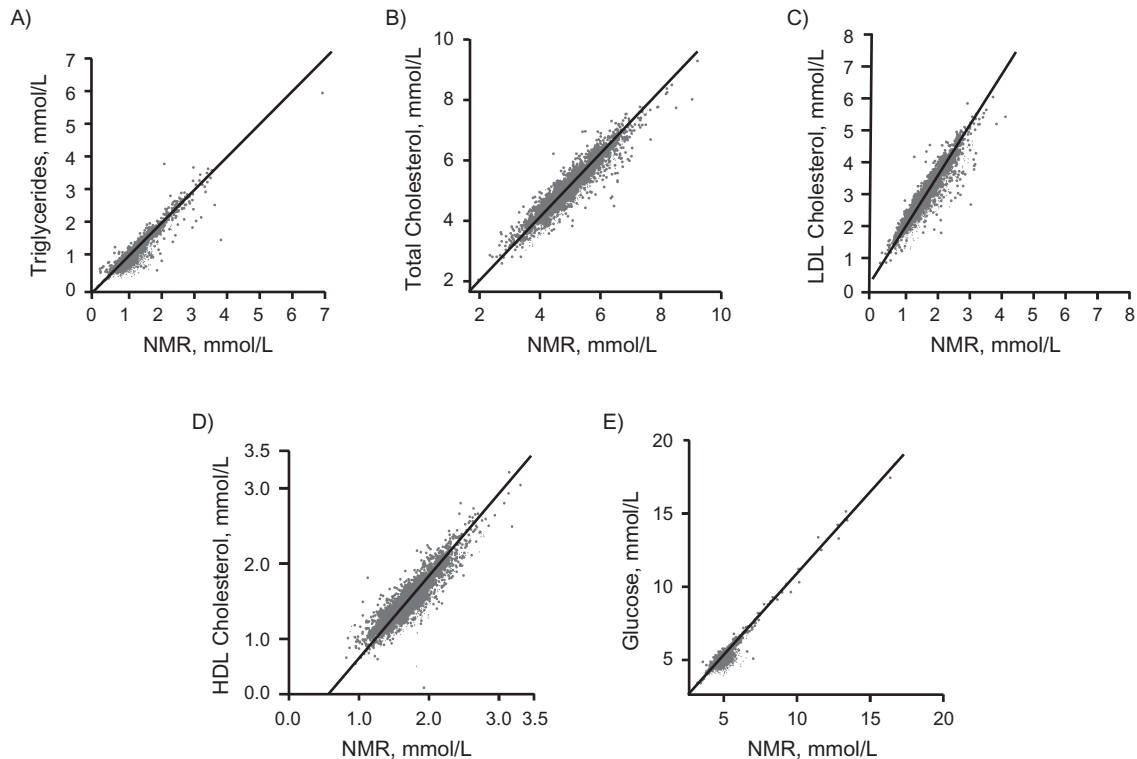

**Figure 1.** Comparison of lipoprotein lipid and glucose quantification in an epidemiologic setting, using nuclear magnetic resonance (NMR) (2013) and routine clinical chemistry assays (*y*-axis) ( $n = 2,749$  from the Avon Longitudinal Study of Children and Parents (ALSPAC) Mothers Cohort) (103). The correlation coefficients are 0.95 (A), 0.94 (B), 0.93 (C), 0.91 (D), and 0.96 (E). The lower concentration of low-density lipoprotein (LDL) cholesterol quantified by NMR than by the Friedewald approximation stems from the latter also containing intermediate-density lipoprotein cholesterol (104). The NMR-based LDL cholesterol refers specifically to cholesterol in the LDL particles with the sizes as defined in Web Figure 1. The correspondence of these measures varies slightly from cohort to cohort, but the correspondence is generally excellent between the clinical chemistry and the NMR for these measures. It is important to note that the comparisons illustrated here do not show strict analytic comparisons with samples undergoing identical processing and storage time, but rather indicate analytic consistency demonstrated in epidemiologic settings. No quantitative assessment of analytic correspondences is therefore made here. When it comes to potential clinical applications of metabolic profiling, more analytic and clinical testing is required, particularly with those metabolic measures that are intended to be used as part of diagnostic protocols. It is also to be expected that official accreditations of analytic and laboratory procedures will be a prerequisite for widespread clinical applications. HDL, high-density lipoprotein.

as profiling of entire cohorts and clinical trials (5, 7). For example, applications of Mendelian randomization for inferring causal relationships with genetic instruments are demanding in terms of sample-size requirements, and therefore they benefit from the high throughput and robust quantification offered by NMR (5, 13, 30, 51). The possibility with NMR to quantify biomarkers directly from serum, including standard cholesterol and triglyceride measures, further makes the platform more reminiscent of clinical chemistry than a technology competing with MS. However, we consider that both metabolomics technologies have great potential in epidemiologic studies and will, in many circumstances, complement each other. We anticipate more applications combining NMR and MS in the near future, particularly as cost-efficiency in MS methodologies and implementations is improved (52–54).

Although the featured NMR platform is currently the only one applied for serum metabolomics in large-scale epidemiology, alternative high-throughput NMR setups exist for detailed

lipid analyses (25, 33, 55). In particular, the method for quantifying lipoprotein particle numbers offered by LabCorp (Raleigh, North Carolina) has been widely used in epidemiologic studies as well as in clinical settings (56, 57). This approach has recently been extended to cover quantification of the inflammatory biomarker glycoprotein acetylation (58, 59). This indicates a step towards combining lipoprotein profiling with quantification of nonlipid biomarkers, a feature otherwise unique to the NMR platform reviewed here. Other large-scale applications of NMR metabolomics have pertained to urine analyses (60–62) and combination of urinary and circulating metabolite data in genomic studies (63, 64), as reviewed previously (20).

#### METABOLIC PROFILING IN EPIDEMIOLOGY

Comprehensive metabolic profiling has recently started to fulfill the promise of benefits for epidemiologic research (5,

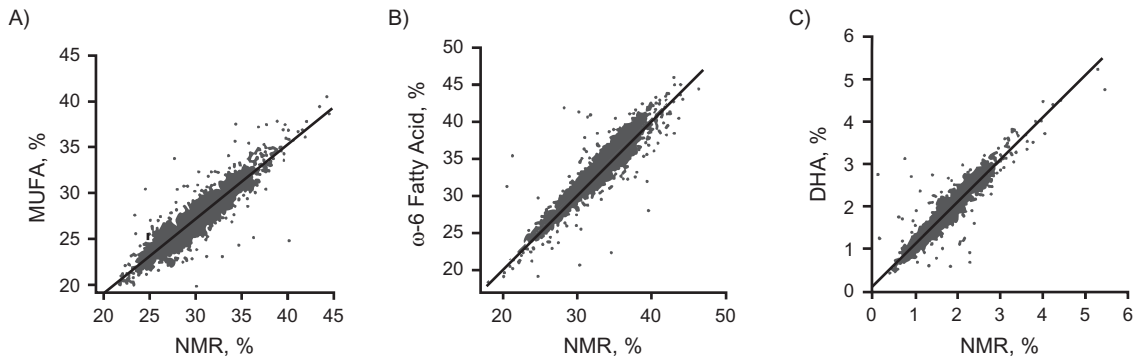

**Figure 2.** Comparison of circulating fatty-acid quantification in an epidemiologic setting, nuclear magnetic resonance (NMR) and gas chromatography ( $y$ -axis) ( $n = 2,193$  from the Cardiovascular Risk in Young Finns Study) (7). The correlation coefficients are 0.92 (A), 0.94 (B), and 0.94 (C). See note on Figure 1 for the analytic correspondence. DHA, docosahexaenoic acid; MUFA, monounsaturated fatty acid.

11, 19). Although many metabolic measures are quantified simultaneously, the same statistical methods can be used as for other clinical chemistry assays. For instance, linear regression modeling can be applied to each metabolic measure individually. This is useful for the initial biomarker assessment and replication, because it facilitates the biological interpretability and enables adjustment for relevant confounders. The multivariate statistical analyses often applied in metabolomics studies make it difficult to integrate analyses with other risk factors and relate results to more established measures. However, analyzing the quantitative biomarker data using standard medical statistics makes it straightforward to combine analyses of the metabolic biomarker panel with conventional risk factors. This can help to put the association magnitudes of novel biomarkers into context, and it further allows investigators to extend the analyses to cover more measures than are obtained by a single metabolomics platform. Nevertheless, straightforward applications of linear regression analyses by no means preclude multivariate or nonlinear analyses—on the contrary, quantitative molecular data facilitate many different statistical approaches (5, 6, 65).

The NMR platform produces the full set of biomarkers for every sample. However, once the data are obtained, investiga-

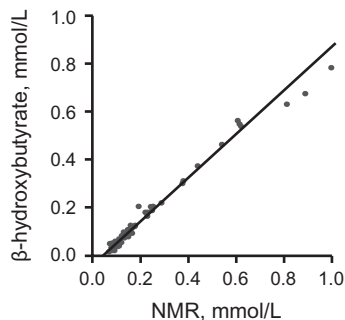

**Figure 3.** Comparison of circulating  $\beta$ -hydroxybutyrate quantification in an epidemiologic setting, using nuclear magnetic resonance (NMR) and an enzymatic method ( $y$ -axis) ( $n = 56$ ) (105). The correlation coefficient is 0.98. See note on Figure 1 for the analytic correspondence.

tors can report results from individual biomarkers (e.g., omega-3 fatty acids (66)), single metabolic pathways (e.g., fatty-acid balance (34)), or all the metabolic measures from the platform (67). There are many scientific advantages in assessing the comprehensive biomarker data across multiple metabolic pathways. In addition to biomarker discovery, this approach has proven to be a powerful way to study risk factors and disease processes that have a systemic impact on the metabolic profile. For instance, adiposity broadly affects systemic metabolism, and comprehensive metabolic profiling therefore provides a more realistic view on the overall molecular associations, many of which would be missed by focusing on established risk factors or single pathways (8). In the case of risk prediction, it is also an asset to have an extensive set of metabolic biomarkers at a fixed cost—the simultaneous quantification of the routine lipid panel, glucose, and inflammation along with many other emerging biomarkers may eventually prove to be pivotal for cost-effective clinical applications (7, 13, 68).

Quantitative metabolomics data allow for hypothesis-driven and hypothesis-free research approaches both. In the case of biomarkers not previously investigated in large cohorts, the hypothesis-free approach feeds hypothesis generation—if there are no prior data on a particular biomarker, an informed hypothesis is unlikely. Regardless of the analytic approach, demonstrating replication in independent samples is important. By replication we do not mean that separate discovery and replication cohorts (as in Fischer et al. (37)) would be necessary. Rather, as recommended for genome-wide association studies (69), joint analyses of multiple independent cohorts and demonstration of consistency (as exemplified in Würtz et al. (13)) is becoming the most common approach. Regarding statistical significance, it is important to account for multiple testing whenever a high number of metabolites are tested. A significance threshold that accounts for multiple testing of correlated measures can be derived by Bonferroni correction for the number of principal components explaining 95%–99% of the variation in the metabolic data (70). For the NMR platform featured in this review, this number is typically 30–50 for each cohort, resulting in a significance threshold of  $P \approx 0.001$ . However, we always advocate replication to judge the robustness of metabolic associations rather than relying on cutpoints for statistical significance.

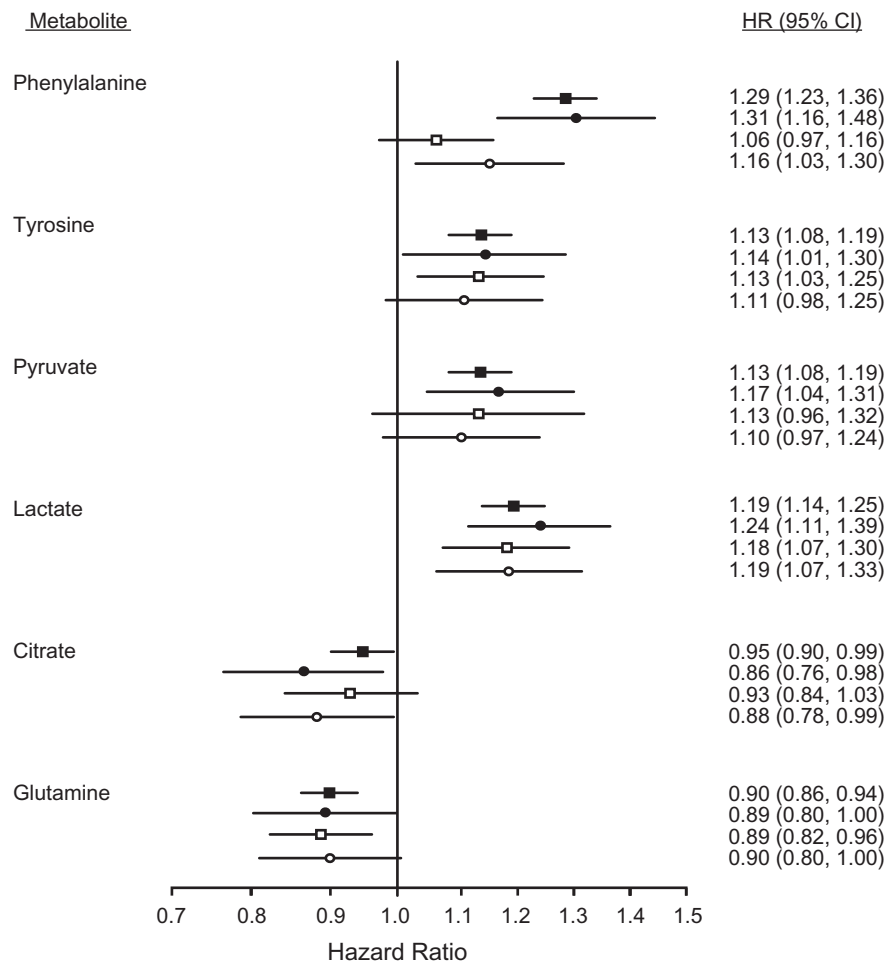

**Figure 4.** Biomarker associations with cardiovascular event risk for selected polar metabolites quantified by both nuclear magnetic resonance (NMR) and mass spectrometry (MS). Filled squares indicate hazard ratios for incident cardiovascular disease, adjusted for age and sex, for 13,441 individuals (1,741 events) profiled by NMR. Open squares show the same biomarker associations in the Framingham Offspring Study (2,289 individuals and 466 events) profiled by MS. Circles indicate the biomarker associations compared for the same subset of 679 individuals (305 events) profiled both by NMR (filled circles) and MS (open circles). The figure is adapted from Würtz et al. (7). CI, confidence interval; HR, hazard ratio.

## OVERVIEW OF LARGE-SCALE METABOLIC PROFILING STUDIES BY NMR

By mid-2016, over 400,000 blood samples from some 150 epidemiologic and clinical studies had been profiled using this NMR platform. These include the INTERVAL study, a randomized trial of blood donors with more than 46,000 individuals (71); the London Life Sciences Prospective Population (LOLIPOP) study with around 30,000 individuals (72); multiple birth cohorts and other population-based studies with several thousand participants each; and twin studies, as well as drug trials and other intervention studies (5). Many of the individual studies are working collaboratively to support replication and, where appropriate, pooling of results to obtain precise estimates and sufficient power for genetic analyses. Table 1 lists the publications to date, in which metabolic profiling data on more than 5,000 people per study have been analyzed; most of the studies include multiple cohorts and some form of replication. In more than half the studies, the number of people with metabolic profiling data is approximately 10,000 or more. The

largest study published features around 35,000 samples analyzed (13). In the following section, we highlight two of these studies in more detail: 1) an evaluation of the causal effects of adiposity on systemic metabolism; and 2) an assessment of the metabolic effects of statin treatment beyond their known effects on low-density lipoprotein (LDL) cholesterol.

### Molecular characterization of adiposity

Many risk factors plausibly affect multiple molecular pathways, but the extent of this is largely unknown because of the inability to study comprehensive influences on systemic metabolism until recently. Determining the metabolic association patterns across multiple pathways can also help to pinpoint similarities in the molecular signatures of different risk factors, as in the case of body mass index (BMI) and birth weight (8, 73).

Our study on metabolic signatures of adiposity in 12,644 adolescents and young adults illustrates the metabolically diverse



effects of BMI (8). BMI was robustly associated cross-sectionally with numerous metabolic biomarkers, as illustrated for selected measures in Web Figure 2. In addition to cross-sectional associations, Mendelian randomization (use of genetic instrumental variables), suggested that BMI had causal effects on multiple metabolic pathways, including atherogenic lipoproteins and lipids, fatty acids, and amino acids (Web Figure 2). The effect of adiposity on systolic blood pressure illustrates the possibility of combining the metabolic data with traditional risk markers. Having adequate power to conduct Mendelian randomization is a benefit of quantitative metabolic profiling in large cohorts (5, 74).

The overall patterns of metabolic associations were similar for cross-sectional and causal estimates. To summarize the causal influences of adiposity across the comprehensive metabolic profile, we charted all causal effect estimates against the corresponding cross-sectional associations (Web Figure 2). The close resemblance indicated that the associations between BMI and circulating biomarkers are likely to reflect the molecular effects of adiposity rather than arising from confounding or reverse causality. Although the effects of adiposity on each individual biomarker are modest, the overall metabolic aberrations may have considerable effects on cardiometabolic risk. Thus, the importance of excess adiposity likely arises from multiple metabolic pathways rather than pertaining to individual risk markers. The linear character of the metabolic associations and the Mendelian randomization analyses further suggest that there is no BMI threshold at which its adverse metabolic effects notably increase. However, analyses of metabolic changes during 6-year follow-up, in a subset of 1,466 young adults, demonstrated that the metabolic profile is highly responsive to changes in BMI with changes congruent with expectation from the results from cross-sectional and Mendelian randomization analyses (8).

### Combining metabolic profiling and genetic data for exploring drug effects

Metabolic profiling of clinical trial samples can be an important resource to assess risk prediction in specific patient groups as well as to provide improved understanding of the molecular effects of interventions. By exploiting various epidemiologic study designs, it may be possible to estimate the metabolic effects of certain drugs even when randomized evidence is not available. For instance, this can be done by examining the metabolic changes associated with starting and stopping the pharmacological treatment in longitudinal studies of observational cohorts, as we have recently demonstrated with statins (13) and hormonal contraception (75). The detailed metabolic effects can in some circumstances be assessed already at the preclinical stage based on genetic variants mimicking the pharmacological action of the drug targets (i.e., using Mendelian randomization) (30, 51, 76). This approach circumvents confounding by indication and other biases inherent in observational studies, although it may be biased by violation of the assumptions of instrumental variables (77–79). In a proof-of-concept study, we combined these 2 approaches to demonstrate how metabolic profiling in observational cohorts can be used to characterize comprehensive metabolic effects of statin therapy (13). The characteristics of the approach are shown in Web Figure 3.

Statins reduce LDL cholesterol concentration by inhibiting 3-hydroxy-3-methylglutaryl-coenzyme A reductase (HMGCR), leading to a proportionate reduction in CVD risk. Statins have been ascribed myriads of pleiotropic properties beyond lowering LDL cholesterol, yet the effects on many lipids and other biomarkers have not been assessed in large studies, primarily due to lack of affordable means. Because no randomized trial data on the metabolic biomarkers were available in our proof-of-concept study (13), the detailed metabolic effects of statins were analyzed from serially collected blood samples, in which a subset of individuals started statin therapy during follow-up. These longitudinal analyses were replicated across 4 cohorts, with consistent results despite differences in demographics and follow-up duration. Starting statin therapy was associated with changes in numerous lipid measures in addition to the anticipated lowering of LDL. Of particular interest was a discordance between the modest lowering of total triglycerides and an efficacious lowering of cholesterol in the very-low-density lipoprotein and intermediate-density lipoprotein particles (i.e., the so-called remnant cholesterol that has been identified as a potential causal culprit in the development of ischemic heart disease) (80, 81). The detailed metabolic profiling suggested that statins are more effective in reducing remnant cholesterol than previously appreciated; this indicates potential cardioprotective benefits of statins beyond LDL-cholesterol lowering. Statin use was not robustly associated with changes in any of the nonlipid metabolites assayed by the platform. These results suggest no substantial side effects of statins on, for example, circulating amino acids. However, larger studies or randomized trials are required to demonstrate potential minor effects on the nonlipid biomarkers, such as glycemic effects of statins (82).

To verify that the observed metabolic changes were actually due to the effects of statins, the analyses were corroborated via Mendelian randomization by using a genetic variant in the *HMGCR* gene as an unconfounded proxy for the pharmacological action of statins. Specifically, we examined the metabolic effects of genetically induced HMGCR inhibition—mimicking a very small statin dose—and compared the metabolic association pattern with *HMGCR* genotypes to the metabolic changes observed longitudinally. We found striking concordance between the observational effects of statins on the metabolic profile and the corresponding associations with the genetic variant in *HMGCR*.

The combination of metabolomics data with genetic data in a large number of individuals readily extends beyond studying statin effects. This type of Mendelian-randomization study design can be seen as a “natural” clinical trial (14). Due to the prohibitively high costs of randomized trials, it is of great interest to assess the detailed metabolic effects of novel targets already in preclinical stages of drug development. Many known and novel drug targets have established genetic proxies mimicking their pharmacological actions, which enables examination of the detailed metabolic association patterns of these targets. We have previously published the metabolic associations of genetic variants in the proprotein convertase subtilisin/kexin type 9 and other lipid genes (5, 51, 83). With the genome-wide association summary statistics publicly available for 123 metabolic measures (30), the fine-grained metabolic signature related to numerous genetic targets can easily be assessed. As extensive metabolomics and genetic data become

increasingly available, we expect that comprehensive metabolic profiles of drug targets will augment drug development in preclinical stages to elucidate molecular mechanisms and clarify pleiotropic effects. It may be particularly helpful to use this type of approach to predict whether it would be worth moving forward to large-scale trials.

## FUTURE PROSPECTS

The studies summarized in Table 1 show some of the potential value of having quantitative metabolomics data in large epidemiologic studies. In the future, we anticipate further integration of metabolic profiling with genetics and other -omics data in large epidemiologic studies. Genome-wide studies on metabolic traits have so far primarily clarified the genetic basis of systemic metabolism (11, 30, 84, 85). The increasing collections of large-scale metabolic profiling with genetics will, via Mendelian randomization, further help to establish causality of the biomarkers as molecular intermediates between lifestyle exposures and diseases (86, 87). Detailed lipoprotein subclass profiling in combination with genetics and clinical trials are likely to be important for uncovering the mechanisms underpinning how triglyceride-rich lipoproteins relate to CVD risk (80, 88) and clarifying the elusive role of high-density lipoprotein in CVD (80, 89). With the linkage of metabolomics data to health-care records, under appropriate ethical and governance frameworks, the potential value of these new quantitative biomarkers could be explored in real-time public health applications. In the near future, alongside continued improvements in throughput and cost-effectiveness, we also look forward to endeavors of multi-omics studies on population cohorts and biobanks with over a million individuals.

## ACKNOWLEDGMENTS

Author affiliations: Computational Medicine, Faculty of Medicine, University of Oulu, Oulu, Finland (Peter Würtz, Antti J. Kangas, Pasi Soinenen, Mika Ala-Korpela); Biocenter Oulu, University of Oulu, Oulu, Finland (Peter Würtz, Antti J. Kangas, Pasi Soinenen, Mika Ala-Korpela); Brainshake Ltd., Helsinki, Finland (Peter Würtz, Antti J. Kangas, Pasi Soinenen); NMR Metabolomics Laboratory, School of Pharmacy, University of Eastern Finland, Kuopio, Finland (Pasi Soinenen, Mika Ala-Korpela); School of Social and Community Medicine, University of Bristol, Bristol, United Kingdom (Debbie A. Lawlor, George Davey Smith, Mika Ala-Korpela); and Medical Research Council Integrative Epidemiology Unit at the University of Bristol, Bristol, United Kingdom (Debbie A. Lawlor, George Davey Smith, Mika Ala-Korpela).

The scientific development and epidemiologic applications of the quantitative serum NMR metabolomics platform has been supported by the Academy of Finland, TEKES—the Finnish Funding Agency for Technology and Innovation, Sigrid Juselius Foundation, Novo Nordisk Foundation, Finnish Diabetes Research Foundation, Paavo Nurmi Foundation, and strategic and infrastructural research funding from the University of Oulu, Finland, as well as by

the British Heart Foundation, Wellcome Trust, and Medical Research Council, UK. P.W. is supported by the Academy of Finland. D.A.L., G.D.S., and M.A.K. work in a Unit that receives funds from the University of Bristol and UK Medical Research Council (MC\_UU\_12013/1, MC\_UU\_12013/5). D.A.L. is a UK National Institute of Health Senior Investigator (NF-SI-0611–10196).

The funders had no role in study design, data collection and analysis, decision to publish, or preparation of the manuscript.

Conflict of interest: P.W., A.J.K., and P.S. are shareholders and employees of Brainshake Ltd. ([www.brainshake.fi](http://www.brainshake.fi)), the company commercializing the NMR metabolomics platform discussed in this article. D.A.L. has received research support from Medtronic and Roche Diagnostics. All authors work in institutions in which the reviewed serum NMR metabolomics platform is in use.

## REFERENCES

- Pickrell JK, Berisa T, Liu JZ, et al. Detection and interpretation of shared genetic influences on 42 human traits. *Nat Genet.* 2016;48(7):709–717.
- Visscher PM, Brown MA, McCarthy MI, et al. Five years of GWAS discovery. *Am J Hum Genet.* 2012;90(1):7–24.
- Gaunt TR, Shihab HA, Hemani G, et al. Systematic identification of genetic influences on methylation across the human life course. *Genome Biol.* 2016;17:61 (doi:10.1186/s13059-016-0926-z).
- Relton CL, Hartwig FP, Davey Smith G. From stem cells to the law courts: DNA methylation, the forensic epigenome and the possibility of a biosocial archive. *Int J Epidemiol.* 2015;44(4):1083–1093.
- Soininen P, Kangas AJ, Würtz P, et al. Quantitative serum nuclear magnetic resonance metabolomics in cardiovascular epidemiology and genetics. *Circ Cardiovasc Genet.* 2015;8(1):192–206.
- Mäkinen VP, Kangas AJ, Soininen P, et al. Metabolic phenotyping of diabetic nephropathy. *Clin Pharmacol Ther.* 2013;94(5):566–569.
- Würtz P, Havulinna AS, Soininen P, et al. Metabolite profiling and cardiovascular event risk: a prospective study of 3 population-based cohorts. *Circulation.* 2015;131(9):774–785.
- Würtz P, Wang Q, Kangas AJ, et al. Metabolic signatures of adiposity in young adults: Mendelian randomization analysis and effects of weight change. *PLoS Med.* 2014;11(12):e1001765.
- Suhre K, Shin SY, Petersen AK, et al. Human metabolic individuality in biomedical and pharmaceutical research. *Nature.* 2011;477(7362):54–60.
- Suhre K. Metabolic profiling in diabetes. *J Endocrinol.* 2014;221(3):R75–R85.
- Suhre K, Raffler J, Kastenmüller G. Biochemical insights from population studies with genetics and metabolomics. *Arch Biochem Biophys.* 2016;589:168–176.
- van Duynhoven JP, Jacobs DM. Assessment of dietary exposure and effect in humans: the role of NMR. *Prog Nucl Magn Reson Spectrosc.* 2016;96:58–72.
- Würtz P, Wang Q, Soininen P, et al. Metabolomic profiling of statin use and genetic inhibition of HMG-CoA reductase. *J Am Coll Cardiol.* 2016;67(10):1200–1210.

14. Voora D, Shah SH. Pharmacometabolomics meets genetics: a “natural” clinical trial of statin effects. *J Am Coll Cardiol*. 2016;67(10):1211–1213.
15. Cheng S. Interrogating the age-old wisdom of exercise. *Circulation*. 2013;127(3):317–319.
16. Ritchie SC, Würtz P, Nath AP, et al. The biomarker GlycA is associated with chronic inflammation and predicts long-term risk of severe infection. *Cell Syst*. 2015;1(4):293–301.
17. Lindon JC, Nicholson JK. The emergent role of metabolic phenotyping in dynamic patient stratification. *Expert Opin Drug Metab Toxicol*. 2014;10(7):915–919.
18. Nicholson JK, Holmes E, Kinross JM, et al. Metabolic phenotyping in clinical and surgical environments. *Nature*. 2012;491(7424):384–392.
19. Roberts LD, Gerszten RE. Toward new biomarkers of cardiometabolic diseases. *Cell Metab*. 2013;18(1):43–50.
20. Tzoulaki I, Ebbels TM, Valdes A, et al. Design and analysis of metabolomics studies in epidemiologic research: a primer on -omic technologies. *Am J Epidemiol*. 2014;180(2):129–139.
21. Würtz P, Mäkinen VP, Soininen P, et al. Metabolic signatures of insulin resistance in 7,098 young adults. *Diabetes*. 2012;61(6):1372–1380.
22. Ala-Korpela M. Critical evaluation of <sup>1</sup>H NMR metabonomics of serum as a methodology for disease risk assessment and diagnostics. *Clin Chem Lab Med*. 2008;46(1):27–42.
23. Soininen P, Kangas AJ, Würtz P, et al. High-throughput serum NMR metabonomics for cost-effective holistic studies on systemic metabolism. *Analyst*. 2009;134(9):1781–1785.
24. Mäkinen VP, Soininen P, Forsblom C, et al. <sup>1</sup>H NMR metabonomics approach to the disease continuum of diabetic complications and premature death. *Mol Syst Biol*. 2008;4:167.
25. Mallol R, Rodríguez MA, Brezmes J, et al. Human serum/plasma lipoprotein analysis by NMR: application to the study of diabetic dyslipidemia. *Prog Nucl Magn Reson Spectrosc*. 2013;70:1–24.
26. Ala-Korpela M. <sup>1</sup>H NMR spectroscopy of human blood plasma. *Prog Nucl Magn Reson Spectrosc*. 1995;27(5-6):475–554.
27. Mierisová S, Ala-Korpela M. MR spectroscopy quantitation: a review of frequency domain methods. *NMR Biomed*. 2001;14(4):247–259.
28. Dona AC, Jiménez B, Schaefer H, et al. Precision high throughput proton NMR spectroscopy of human urine, serum and plasma for large-scale metabolic phenotyping. *Anal Chem*. 2014;86(19):9887–9894.
29. Demirkan A, Henneman P, Verhoeven A, et al. Insight in genome-wide association of metabolite quantitative traits by exome sequence analyses. *PLoS Genet*. 2015;11(1):e1004835.
30. Kettunen J, Demirkan A, Würtz P, et al. Genome-wide study for circulating metabolites identifies 62 loci and reveals novel systemic effects of LPA. *Nat Commun*. 2016;7:11122.
31. Mallol R, Amigó N, Rodríguez MA, et al. Liposcale: a novel advanced lipoprotein test based on 2D diffusion-ordered <sup>1</sup>H NMR spectroscopy. *J Lipid Res*. 2015;56(3):737–746.
32. Mihaleva VV, van Schalkwijk DB, de Graaf AA, et al. A systematic approach to obtain validated partial least square models for predicting lipoprotein subclasses from serum NMR spectra. *Anal Chem*. 2014;86(1):543–550.
33. Jeyarajah EJ, Cromwell WC, Otvos JD. Lipoprotein particle analysis by nuclear magnetic resonance spectroscopy. *Clin Lab Med*. 2006;26(4):847–870.
34. Mahendran Y, Cederberg H, Vangipurapu J, et al. Glycerol and fatty acids in serum predict the development of hyperglycemia and type 2 diabetes in Finnish men. *Diabetes Care*. 2013;36(11):3732–3738.
35. Superko HR, Superko SM, Nasir K, et al. Omega-3 fatty acid blood levels: clinical significance and controversy. *Circulation*. 2013;128(19):2154–2161.
36. Wang J, Stančáková A, Soininen P, et al. Lipoprotein subclass profiles in individuals with varying degrees of glucose tolerance: a population-based study of 9399 Finnish men. *J Intern Med*. 2012;272(6):562–572.
37. Fischer K, Kettunen J, Würtz P, et al. Biomarker profiling by nuclear magnetic resonance spectroscopy for the prediction of all-cause mortality: an observational study of 17,345 persons. *PLoS Med*. 2014;11(2):e1001606.
38. Tukiainen T, Tynkkynen T, Mäkinen VP, et al. A multi-metabolite analysis of serum by <sup>1</sup>H NMR spectroscopy: early systemic signs of Alzheimer’s disease. *Biochem Biophys Res Commun*. 2008;375(3):356–361.
39. Inouye M, Kettunen J, Soininen P, et al. Metabonomic, transcriptomic, and genomic variation of a population cohort. *Mol Syst Biol*. 2010;6:441.
40. Wider G, Dreier L. Measuring protein concentrations by NMR spectroscopy. *J Am Chem Soc*. 2006;128(8):2571–2576.
41. Vehtari A, Mäkinen VP, Soininen P, et al. A novel Bayesian approach to quantify clinical variables and to determine their spectroscopic counterparts in <sup>1</sup>H NMR metabonomic data. *BMC Bioinformatics*. 2007;8(suppl 2):S8.
42. Mahendran Y, Vangipurapu J, Cederberg H, et al. Association of ketone body levels with hyperglycemia and type 2 diabetes in 9,398 Finnish men. *Diabetes*. 2013;62(10):3618–3626.
43. Stančáková A, Civelek M, Saleem NK, et al. Hyperglycemia and a common variant of GCKR are associated with the levels of eight amino acids in 9,369 Finnish men. *Diabetes*. 2012;61(7):1895–1902.
44. Tillin T, Hughes AD, Wang Q, et al. Diabetes risk and amino acid profiles: cross-sectional and prospective analyses of ethnicity, amino acids and diabetes in a South Asian and European cohort from the SABRE (Southall And Brent REvisited) Study. *Diabetologia*. 2015;58(5):968–979.
45. Dunn WB, Broadhurst DI, Atherton HJ, et al. Systems level studies of mammalian metabolomes: the roles of mass spectrometry and nuclear magnetic resonance spectroscopy. *Chem Soc Rev*. 2011;40(1):387–426.
46. Guasch-Ferré M, Hruby A, Toledo E, et al. Metabolomics in prediabetes and diabetes: a systematic review and meta-analysis. *Diabetes Care*. 2016;39(5):833–846.
47. Lind MV, Savolainen OI, Ross AB. The use of mass spectrometry for analysing metabolite biomarkers in epidemiology: methodological and statistical considerations for application to large numbers of biological samples. *Eur J Epidemiol*. 2016;31(8):717–733.
48. Mundra PA, Shaw JE, Meikle PJ. Lipidomic analyses in epidemiology. *Int J Epidemiol*. 2016;45(5):1329–1338.
49. Quehenberger O, Dennis EA. The human plasma lipidome. *N Engl J Med*. 2011;365(19):1812–1823.
50. Shin SY, Fauman EB, Petersen AK, et al. An atlas of genetic influences on human blood metabolites. *Nat Genet*. 2014;46(6):543–550.
51. Würtz P, Kangas AJ, Soininen P, et al. Lipoprotein subclass profiling reveals pleiotropy in the genetic variants of lipid risk factors for coronary heart disease: a note on Mendelian randomization studies. *J Am Coll Cardiol*. 2013;62(20):1906–1908.
52. Hofer IE, Steffens S, Ala-Korpela M, et al. Novel methodologies for biomarker discovery in atherosclerosis. *Eur Heart J*. 2015;36(39):2635–2642.

53. Wahl S, Vogt S, Stücker F, et al. Multi-omic signature of body weight change: results from a population-based cohort study. *BMC Med.* 2015;13(1):48.
54. Vogt S, Wahl S, Kettunen J, et al. Characterization of the metabolic profile associated with serum 25-hydroxyvitamin D: a cross-sectional analysis in population-based data. *Int J Epidemiol.* 2016;45(5):1469–1481.
55. Petersen AK, Stark K, Musameh MD, et al. Genetic associations with lipoprotein subfractions provide information on their biological nature. *Hum Mol Genet.* 2012; 21(6):1433–1443.
56. Mora S, Glynn RJ, Ridker PM. High-density lipoprotein cholesterol, size, particle number, and residual vascular risk after potent statin therapy. *Circulation.* 2013;128(11): 1189–1197.
57. Mora S, Buring JE, Ridker PM. Discordance of low-density lipoprotein (LDL) cholesterol with alternative LDL-related measures and future coronary events. *Circulation.* 2014; 129(5):553–561.
58. Otvos JD, Shalurova I, Wolak-Dinsmore J, et al. GlycA: a composite nuclear magnetic resonance biomarker of systemic inflammation. *Clin Chem.* 2015;61(5):714–723.
59. Ala-Korpela M. Serum nuclear magnetic resonance spectroscopy: one more step toward clinical utility. *Clin Chem.* 2015;61(5):681–683.
60. Holmes E, Loo RL, Stampler J, et al. Human metabolic phenotype diversity and its association with diet and blood pressure. *Nature.* 2008;453(7193):396–400.
61. Elliott P, Pasma JM, Chan Q, et al. Urinary metabolic signatures of human adiposity. *Sci Transl Med.* 2015;7(285):285ra62.
62. Alonso A, Julià A, Vinaixa M, et al. Urine metabolome profiling of immune-mediated inflammatory diseases. *BMC Med.* 2016;14(1):133.
63. Suhre K, Wallaschofski H, Raffler J, et al. A genome-wide association study of metabolic traits in human urine. *Nat Genet.* 2011;43(6):565–569.
64. Raffler J, Friedrich N, Arnold M, et al. Genome-wide association study with targeted and non-targeted NMR metabolomics identifies 15 novel loci of urinary human metabolic individuality. *PLoS Genet.* 2015;11(9):e1005487.
65. Ala-Korpela M, Kangas AJ, Soininen P. Quantitative high-throughput metabolomics: a new era in epidemiology and genetics. *Genome Med.* 2012;4(4):36.
66. Skilton MR, Mikkilä V, Würtz P, et al. Fetal growth, omega-3 (n-3) fatty acids, and progression of subclinical atherosclerosis: preventing fetal origins of disease? The Cardiovascular Risk in Young Finns Study. *Am J Clin Nutr.* 2013;97(1):58–65.
67. Drenos F, Davey Smith G, Ala-Korpela M, et al. Metabolic characterization of a rare genetic variation within *APOC3* and its lipoprotein lipase-independent effects. *Circ Cardiovasc Genet.* 2016;9(3):231–239.
68. Niiranen TJ, Vasani RS. Epidemiology of cardiovascular disease: recent novel outlooks on risk factors and clinical approaches. *Expert Rev Cardiovasc Ther.* 2016;14(7): 855–869.
69. Skol AD, Scott LJ, Abecasis GR, et al. Joint analysis is more efficient than replication-based analysis for two-stage genome-wide association studies. *Nat Genet.* 2006;38(2): 209–213.
70. Kujala UM, Mäkinen VP, Heinonen I, et al. Long-term leisure-time physical activity and serum metabolome. *Circulation.* 2013;127(3):340–348.
71. Moore C, Sambrook J, Walker M, et al. The INTERVAL trial to determine whether intervals between blood donations can be safely and acceptably decreased to optimise blood supply: study protocol for a randomised controlled trial. *Trials.* 2014; 15:363 (doi:10.1186/1745-6215-15-363).
72. Chambers JC, Loh M, Lehne B, et al. Epigenome-wide association of DNA methylation markers in peripheral blood from Indian Asians and Europeans with incident type 2 diabetes: a nested case-control study. *Lancet Diabetes Endocrinol.* 2015;3(7):526–534.
73. Würtz P, Wang Q, Niironen M, et al. Metabolic signatures of birthweight in 18 288 adolescents and adults. *Int J Epidemiol.* 2016;45(5):1539–1550.
74. Wang Q, Kangas AJ, Soininen P, et al. Sex hormone-binding globulin associations with circulating lipids and metabolites and the risk for type 2 diabetes: observational and causal effect estimates. *Int J Epidemiol.* 2015;44(2):623–637.
75. Wang Q, Würtz P, Auro K, et al. Effects of hormonal contraception on systemic metabolism: cross-sectional and longitudinal evidence. *Int J Epidemiol.* 2016;45(5):1445–1457.
76. Interleukin 1 Genetics Consortium. Cardiometabolic effects of genetic upregulation of the interleukin 1 receptor antagonist: a Mendelian randomisation analysis. *Lancet Diabetes Endocrinol.* 2015;3(4):243–253.
77. Smith GD, Ebrahim S. “Mendelian randomization”: can genetic epidemiology contribute to understanding environmental determinants of disease? *Int J Epidemiol.* 2003;32(1):1–22.
78. Lawlor DA, Harbord RM, Sterne JA, et al. Mendelian randomization: using genes as instruments for making causal inferences in epidemiology. *Stat Med.* 2008;27(8): 1133–1163.
79. Bowden J, Davey Smith G, Burgess S. Mendelian randomization with invalid instruments: effect estimation and bias detection through Egger regression. *Int J Epidemiol.* 2015;44(2):512–525.
80. Do R, Willer CJ, Schmidt EM, et al. Common variants associated with plasma triglycerides and risk for coronary artery disease. *Nat Genet.* 2013;45(11):1345–1352.
81. Nordestgaard BG, Varbo A. Triglycerides and cardiovascular disease. *Lancet.* 2014;384(9943):626–635.
82. Swerdlow DI, Preiss D, Kuchenbaecker KB, et al. HMG-coenzyme A reductase inhibition, type 2 diabetes, and bodyweight: evidence from genetic analysis and randomised trials. *Lancet.* 2015;385(9965):351–361.
83. Tukiainen T, Kettunen J, Kangas AJ, et al. Detailed metabolic and genetic characterization reveals new associations for 30 known lipid loci. *Hum Mol Genet.* 2012;21(6):1444–1455.
84. Kastenmüller G, Raffler J, Gieger C, et al. Genetics of human metabolism: an update. *Hum Mol Genet.* 2015;24(R1): R93–R101.
85. Kettunen J, Tukiainen T, Sarin AP, et al. Genome-wide association study identifies multiple loci influencing human serum metabolite levels. *Nat Genet.* 2012;44(3):269–276.
86. Relton CL, Davey Smith G. Two-step epigenetic Mendelian randomization: a strategy for establishing the causal role of epigenetic processes in pathways to disease. *Int J Epidemiol.* 2012;41(1):161–176.
87. Burgess S, Scott RA, Timpson NJ, et al. Using published data in Mendelian randomization: a blueprint for efficient identification of causal risk factors. *Eur J Epidemiol.* 2015; 30(7):543–552.
88. Myocardial Infarction Genetics and CARDIoGRAM Exome Consortia Investigators, Stitzel NO, Stirrups KE, et al. Coding variation in *ANGPTL4*, *LPL*, and *SVEP1* and the risk of coronary disease. *N Engl J Med.* 2016;374(12): 1134–1144.

89. Zanoni P, Khetarpal SA, Larach DB, et al. Rare variant in scavenger receptor BI raises HDL cholesterol and increases risk of coronary heart disease. *Science*. 2016;351(6278):1166–1171.
90. Fizeleva M, Miilunpohja M, Kangas AJ, et al. Associations of multiple lipoprotein and apolipoprotein measures with worsening of glycemia and incident type 2 diabetes in 6607 non-diabetic Finnish men. *Atherosclerosis*. 2015;240(1):272–277.
91. Vangipurapu J, Stančáková A, Kuulasmaa T, et al. Association between liver insulin resistance and cardiovascular risk factors. *J Intern Med*. 2012;272(4):402–408.
92. Auro K, Joensuu A, Fischer K, et al. A metabolic view on menopause and ageing. *Nat Commun*. 2014;5:4708.
93. Würtz P, Cook S, Wang Q, et al. Metabolic profiling of alcohol consumption in 9778 young adults. *Int J Epidemiol*. 2016;45(5):1493–1506.
94. Inouye M, Ripatti S, Kettunen J, et al. Novel loci for metabolic networks and multi-tissue expression studies reveal genes for atherosclerosis. *PLoS Genet*. 2012;8(8):e1002907.
95. Stančáková A, Paananen J, Soininen P, et al. Effects of 34 risk loci for type 2 diabetes or hyperglycemia on lipoprotein subclasses and their composition in 6,580 nondiabetic Finnish men. *Diabetes*. 2011;60(5):1608–1616.
96. Chambers JC, Zhang W, Sehmi J, et al. Genome-wide association study identifies loci influencing concentrations of liver enzymes in plasma. *Nat Genet*. 2011;43(11):1131–1138.
97. International Consortium for Blood Pressure Genome-Wide Association Studies, Ehret GB, Munroe PB, et al. Genetic variants in novel pathways influence blood pressure and cardiovascular disease risk. *Nature*. 2011;478(7367):103–109.
98. Roman TS, Marvelle AF, Fogarty MP, et al. Multiple hepatic regulatory variants at the *GALNT2* GWAS locus associated with high-density lipoprotein cholesterol. *Am J Hum Genet*. 2015;97(6):801–815.
99. Cichonska A, Rousu J, Marttinen P, et al. metaCCA: summary statistics-based multivariate meta-analysis of genome-wide association studies using canonical correlation analysis. *Bioinformatics*. 2016;32(13):1981–1989.
100. Marttinen P, Pirinen M, Sarin AP, et al. Assessing multivariate gene-metabolome associations with rare variants using Bayesian reduced rank regression. *Bioinformatics*. 2014;30(14):2026–2034.
101. Gillberg J, Marttinen P, Pirinen M, et al. Multiple output regression with latent noise. *J Mach Learn Res*. 2016;17:1–35.
102. Valcárcel B, Ebbels TM, Kangas AJ, et al. Genome metabolome integrated network analysis to uncover connections between genetic variants and complex traits: an application to obesity. *J R Soc Interface*. 2014;11(94):20130908.
103. Fraser A, Macdonald-Wallis C, Tilling K, et al. Cohort profile: the Avon Longitudinal Study of Parents and Children: ALSPAC mothers cohort. *Int J Epidemiol*. 2013;42(1):97–110.
104. Niemi J, Mäkinen VP, Heikkonen J, et al. Estimation of VLDL, IDL, LDL, HDL2, apoA-I, and apoB from the Friedewald inputs—apoB and IDL, but not LDL, are associated with mortality in type 1 diabetes. *Ann Med*. 2009;41(6):451–461.
105. Männistö VT, Simonen M, Hyysalo J, et al. Ketone body production is differentially altered in steatosis and non-alcoholic steatohepatitis in obese humans. *Liver Int*. 2015;35(7):1853–1861.
